# Supplementary material
Source: PubMed Central journal article supplement (PMC8173276)
Supplement: NIHMS1589568-supplement-Supplementary_information.pdf [file NIHMS1589568-supplement-Supplementary_information.pdf]

**Table S1. Characteristics of patients with ALD listed for liver transplant.**

|                                   | Men<br>n=121 | Women<br>n=33 | p-value |
|-----------------------------------|--------------|---------------|---------|
| Age (years)                       | 54 ± 9       | 53 ± 9        | 0.65    |
| White                             | 107 (88%)    | 27 (82%)      | 0.32    |
| with HCC                          | 15 (12%)     | 3 (9%)        | 0.6     |
| with HCV infection                | 26 (21%)     | 4 (12%)       | 0.23    |
| MELD                              | 18 ± 6       | 19 ± 10       | 0.002*  |
| Medicaid                          | 13 (11%)     | 7 (21%)       | 0.11    |
| College or higher                 | 59 (49%)     | 15 (45%)      | 0.75    |
| Unemployed                        | 59 (49%)     | 10 (30%)      | 0.06    |
| Married                           | 80 (66%)     | 15 (45%)      | 0.03*   |
| Has children                      | 96 (79%)     | 24 (72%)      | 0.42    |
| Lifetime alcohol use              | 120 (99%)    | 32 (97%)      | 0.32    |
| Lifetime tobacco use              | 76 (63%)     | 15 (46%)      | 0.07    |
| Lifetime Marijuana use            | 37 (30%)     | 6 (18%)       | 0.16    |
| Lifetime opiate use               | 10 (8%)      | 2 (6%)        | 0.68    |
| Lifetime substance use            | 18 (15%)     | 4 (12%)       | 0.69    |
| Health/legal consequences         | 26 (22%)     | 4 (12%)       | 0.23    |
| History of prior SUD treatment    | 47 (39%)     | 13 (39%)      | 0.95    |
| Psychiatry comorbidities          | 30 (25%)     | 10 (30%)      | 0.52    |
| Prior psychiatric pharmacotherapy | 19 (16%)     | 6 (18%)       | 0.73    |
| Toxicology completed              | 113 (93%)    | 32 (97%)      | 0.48    |
| SUD treatment                     | 50 (41%)     | 18 (54%)      | 0.18    |
| SUD pharmacotherapy               | 7 (5.7%)     | 0 (0%)        | 0.57    |

HCC: Hepatocellular carcinoma, HCV: Hepatitis C virus, MELD: Model for end stage liver disease, SUD: Substance use disorder

\*p<0.05

**Table S2. Characteristics of Women with ALD by listing status.**

|                                   | Not Listed<br>n=278 | Listed<br>n=33 | p-value |
|-----------------------------------|---------------------|----------------|---------|
| Age (years)                       | 52 ± 9              | 53 ± 9         | 0.51    |
| White                             | 228 (82%)           | 27 (82%)       | 0.98    |
| with HCC                          | 4 (1.4%)            | 3 (9%)         | 0.005*  |
| with HCV infection                | 43 (16%)            | 4 (12%)        | 0.61    |
| MELD                              | 15 ± 9              | 19 ± 10        | 0.12    |
| Medicaid                          | 89 (32%)            | 7 (21%)        | 0.20    |
| College or higher                 | 82 (30%)            | 15 (45%)       | 0.03*   |
| Unemployed                        | 85 (30%)            | 10 (30%)       | 0.97    |
| Married                           | 149 (54%)           | 15 (45%)       | 0.37    |
| Has children                      | 208 (75%)           | 24 (72%)       | 0.79    |
| Lifetime alcohol use              | 269 (97%)           | 32 (97%)       | 0.95    |
| Lifetime tobacco use              | 160 (57%)           | 15 (46%)       | 0.19    |
| Lifetime Marijuana use            | 64 (23%)            | 6 (18%)        | 0.53    |
| Lifetime opiate use               | 51 (18%)            | 2 (6%)         | 0.07    |
| Lifetime substance use            | 26 (9%)             | 4 (12%)        | 0.61    |
| Health/legal consequences         | 44 (16%)            | 4 (12%)        | 0.57    |
| History of prior SUD treatment    | 76 (27%)            | 13 (39%)       | 0.15    |
| Psychiatry comorbidities          | 128 (46%)           | 10 (30%)       | 0.08    |
| Prior psychiatric pharmacotherapy | 68 (25%)            | 6 (18%)        | 0.42    |
| Toxicology completed              | 212 (76%)           | 32 (97%)       | 0.006*  |
| SUD treatment                     | 122 (44%)           | 18 (54%)       | 0.25    |
| SUD pharmacotherapy               | 1 (0.4%)            | 0 (0%)         | 0.73    |

HCC: Hepatocellular carcinoma, HCV: Hepatitis C virus, MELD: Model for end stage liver disease, SUD: Substance use disorder

\*p<0.05

**Table S3 Characteristics of non-HCC Patients Evaluated for Liver Transplant.**

| Evaluations                       | Men          | Women     | p-value |
|-----------------------------------|--------------|-----------|---------|
| n=907                             | n=603        | n=304     |         |
| Age (years)                       | 53 ± 7       | 52 ± 9    | 0.56    |
| White                             | 519 (86%)    | 248 (82%) | 0.08    |
| with HCV infection                | 133 (22%)    | 47 (15%)  | 0.02*   |
| MELD                              | 16 ± 8       | 16 ± 8    | 0.21    |
| Medicaid                          | 159(26%)     | 94 (31%)  | 0.15    |
| College or higher                 | 202 (33%)    | 93 (31%)  | 0.44    |
| Unemployed                        | 240 (40%)    | 92(30%)   | 0.005*  |
| Married                           | 330 (55%)    | 159 (52%) | 0.49    |
| Has children                      | 425 (70%)    | 228 (75%) | 0.15    |
| Lifetime alcohol use              | 582 (97%)    | 294 (97%) | 0.88    |
| Lifetime tobacco use              | 383 (64%)    | 172 (56%) | 0.04*   |
| Lifetime Marijuana use            | 217 (36%)    | 67 (22%)  | <0.005* |
| Lifetime opiate use               | 107 (18%)    | 53 (17%)  | 0.91    |
| Lifetime substance use            | 97 (16%)     | 29 (10%)  | 0.007*  |
| Health/legal consequences         | 155 (26%)    | 46 (15%)  | <0.005* |
| History of prior SUD treatment    | 176 (29%)    | 87 (29%)  | 0.86    |
| Psychiatry comorbidities          | 163 (27%)    | 134 (44%) | <0.005* |
| Prior psychiatric pharmacotherapy | 87 (14%)     | 742(24%)  | 0.001*  |
| SIPAT score                       | 4.41 ± 12.73 | 6 ± 15.22 | 0.09    |
| Toxicology completed              | 485 (80%)    | 238 (78%) | 0.45    |
| SUD treatment                     | 224 (37%)    | 137 (45%) | 0.02*   |
| SUD pharmacotherapy               | 7 (1%)       | 1 (0.3%)  | 0.22    |

HCC: Hepatocellular carcinoma, HCV: Hepatitis C virus, MELD: Model for end stage liver disease, SUD: Substance use disorder

\*p<0.05

**Table S4. Natural history of non-HCC ALD patients evaluated for LT.**

| Evaluated (n=907)         | Male (n=603) | Female (n=304) | p-value |
|---------------------------|--------------|----------------|---------|
| Listed                    | 106 (18%)    | 30 (10%)       | 0.002*  |
| Evaluation to list (days) | 130 ± 87     | 124 ± 87       | 0.05    |
| Not listed reason         |              |                |         |
| too well                  | 111 (18%)    | 64 (21%)       | 0.34    |
| medical issues            | 82(14%)      | 34 (11%)       | 0.30    |
| Substance use             | 211 (35%)    | 128 (42%)      | 0.04*   |
| Others                    | 93 (15%)     | 48 (16%)       | 0.65    |
| <hr/>                     |              |                |         |
| Listed (n=154)            | Male (n=106) | Female (n=30)  | P=value |
| Transplanted              | 47 (44%)     | 12 (40%)       | 0.02*   |
| remain on list            | 25 (21%)     | 6 (18%)        | 0.09    |
| Not transplanted reason   |              |                |         |
| deceased                  | 12 (11%)     | 5 (16%)        | 0.1     |
| medical issues            | 7 (7%)       | 3 (10%)        | 0.11    |
| Substance use             | 12 (11%)     | 1 (3%)         | 0.05    |
| Others                    | 3 (2%)       | 3 (10%)        | 0.07    |
